# Supplementary material
Source: PubMed Central journal article supplement (PMC6778351)
Supplement: jcsm.15.10.1459SD1.pdf [file jcsm.15.10.1459SD1.pdf]

**Table S1**—Multivariate analysis of predictors of first-time recurrence of AF after AF intervention (female only).

| <b>Variable</b> | <b>HR</b> | <b>95% CI</b> | <b>P</b>      |
|-----------------|-----------|---------------|---------------|
| BMI             | 1.027     | 1.001–1.053   | <b>0.0412</b> |
| LAVI            | 1.009     | 0.991–1.028   | 0.3362        |
| Cardioversion   | 2.073     | 0.943–4.557   | 0.0695        |
| Digoxin         | 1.148     | 0.550–2.395   | 0.7125        |

BMI, body mass index; CI, confidence interval; HR, hazard ratio; LAVI, left atrial volume index.

**Table S2**—Multivariate analysis of predictors of first-time recurrence of AF after AF intervention (male only).

| <b>Variable</b> | <b>HR</b> | <b>95% CI</b> | <b>P</b>      |
|-----------------|-----------|---------------|---------------|
| BMI             | 1.011     | 0.999–1.023   | 0.0779        |
| LAVI            | 1.010     | 1.000–1.020   | 0.0619        |
| Cardioversion   | 1.926     | 1.250–2.968   | <b>0.0029</b> |
| Digoxin         | 1.465     | 0.985–2.178   | 0.0592        |

BMI, body mass index; CI, confidence interval; HR, hazard ratio; LAVI, left atrial volume index.
